# Supplementary material
Source: PubMed Central journal article supplement (PMC6140709)
Supplement: jps-43-3-D18-020_s001.pdf [file jps-43-3-D18-020_s001.pdf]

# Journal of Pesticide Science

supplementary materials

DOI:10.1584/jpestics.D18-020

## **Transcriptome analysis of *Arabidopsis thaliana* treated with green leaf volatiles: possible role of green leaf volatiles as self-made damage-associated molecular patterns**

Yasuo YAMAUCHI, Aya MATSUDA, Nagisa MATSUURA, Masaharu  
MIZUTANI, Yukihiro SUGIMOTO

Pesticide Science Society of Japan

*<http://pssj2.jp/eng/>*

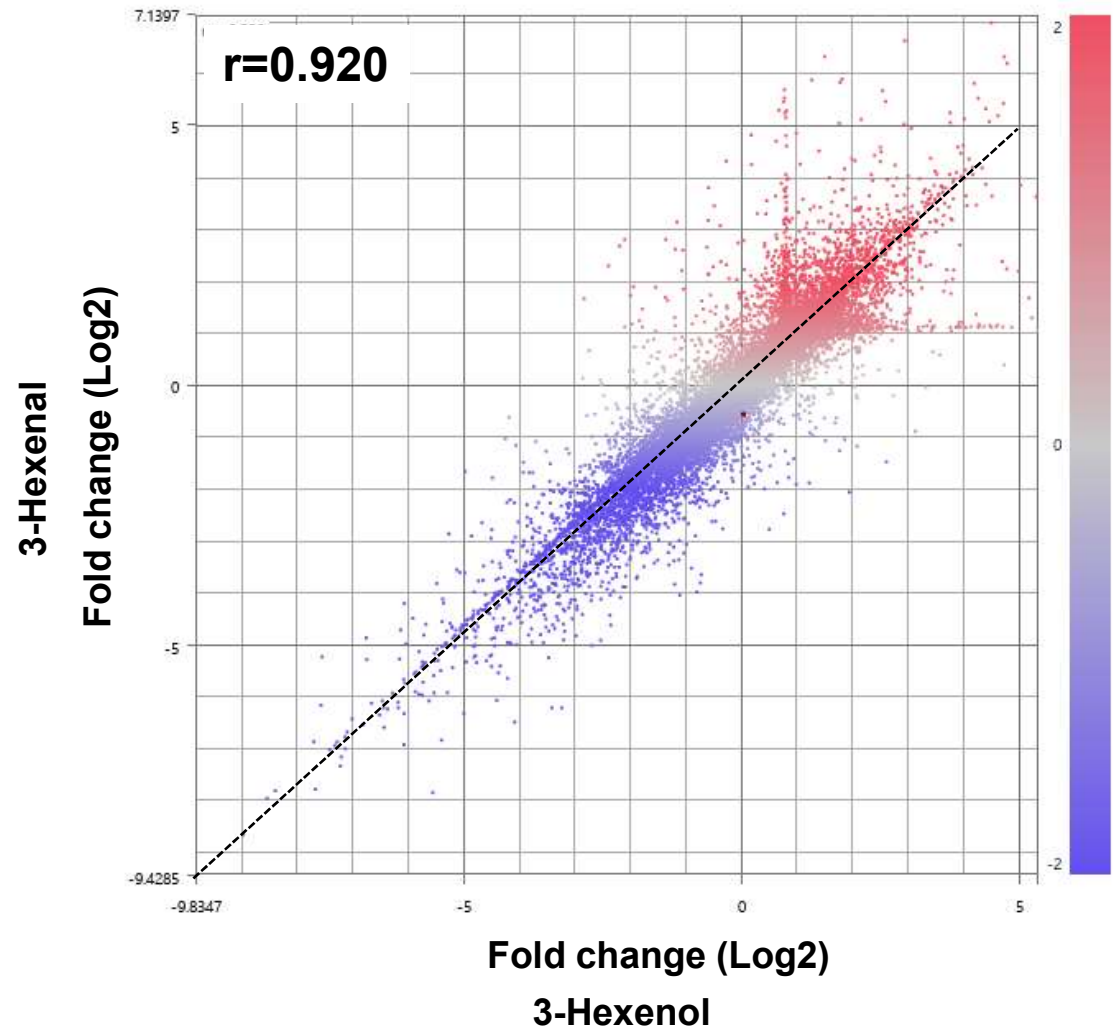

**Fig. S1**

High correlation of gene expression between 3-Hal and 3-Hol treatment. Dotted line indicates a theoretical line if a gene whose induction ratio is equal between 3-Hal and 3-Hol treatments.

**Table S1.** Top100 up-regulated genes in Arabidopsis treated by 3-hexenal

| Rank | Description                                                                                                                                                 | Fold change (Log <sub>2</sub> Ratio) | Accession |
|------|-------------------------------------------------------------------------------------------------------------------------------------------------------------|--------------------------------------|-----------|
| 1    | Arabidopsis thaliana transcription factor bHLH100 mRNA, complete cds [NM_129689]                                                                            | 7.12                                 | NM_129689 |
| 2    | Arabidopsis thaliana putative chitinase mRNA, complete cds [NM_129919]                                                                                      | 6.31                                 | NM_129919 |
| 3    | Arabidopsis thaliana transcription factor ORG2 mRNA, complete cds [NM_115556]                                                                               | 5.87                                 | NM_115556 |
| 4    | Arabidopsis thaliana uncharacterized protein mRNA, complete cds [NM_201723]                                                                                 | 5.82                                 | NM_201723 |
| 5    | Arabidopsis thaliana plant natriuretic peptide A mRNA, complete cds [NM_179648]                                                                             | 5.52                                 | NM_179648 |
| 6    | AYAXN56TF pooled cDNA populations Arabidopsis thaliana cDNA, mRNA sequence [EG525475]                                                                       | 5.39                                 | EG525475  |
| 7    | Arabidopsis thaliana core-2 $\beta$ -branching beta-1,6-N-acetylglucosaminyltransferase-like protein mRNA, complete cds [NM_104189]                         | 5.18                                 | NM_104189 |
| 8    | Arabidopsis thaliana beta 1,3-glucanase 2 mRNA, complete cds [NM_115586]                                                                                    | 5.05                                 | NM_115586 |
| 9    | Arabidopsis thaliana nodulin MIN21-like transporter family protein mRNA, complete cds [NM_118943]                                                           | 4.95                                 | NM_118943 |
| 10   | 12826078 CERES-AN65 Arabidopsis thaliana cDNA clone 1361839 5', mRNA sequence [DR368472]                                                                    | 4.61                                 | DR368472  |
| 11   | Arabidopsis thaliana alpha-amylase 1 mRNA, complete cds [NM_118632]                                                                                         | 4.57                                 | NM_118632 |
| 12   | Arabidopsis thaliana methionine sulfoxide reductase B8 mRNA, complete cds [NM_118304]                                                                       | 4.36                                 | NM_118304 |
| 13   | Arabidopsis thaliana 3'(2'),5'-bisphosphate nucleotidase mRNA, complete cds [NM_125796]                                                                     | 4.29                                 | NM_125796 |
| 14   | Arabidopsis thaliana cysteine-rich receptor-like protein kinase 7 mRNA, complete cds [NM_118444]                                                            | 4.23                                 | NM_118444 |
| 15   | Arabidopsis thaliana Full-length cDNA Complete sequence from clone GSLTPGH78ZH03 of Hormone Treated Callus of strain col-0 of Arabidopsis thaliana (thale c | 4.21                                 | BX832525  |
| 16   | Rep: Asparagine synthetase [glutamine-hydrolyzing] - Sandersonia aurantiaca (Christmas-bells) (Chinese-lantern lily), partial (5%) [TC393092]               | 4.09                                 | TA29936_3 |
| 17   | Rep: Chromosome chr14 scaffold_9, whole genome shotgun sequence - Vitis vinifera (Grape), partial (42%) [TC383079]                                          | 3.93                                 | TA29106_3 |
| 18   | Arabidopsis thaliana ROTUNDIFOLIA like 21 protein mRNA, complete cds [NM_001084313]                                                                         | 3.89                                 | NM_001084 |
| 19   | Arabidopsis thaliana uncharacterized protein mRNA, complete cds [NM_122326]                                                                                 | 3.83                                 | NM_122326 |
| 20   | Rep: Cysteine-rich receptor-like protein kinase 19 precursor - Arabidopsis thaliana (Mouse-ear cress), partial (21%) [TC392962]                             | 3.79                                 | T43643    |
| 21   | GB transposable element gene                                                                                                                                | 3.79                                 | NP456970  |
| 22   | Arabidopsis thaliana vacuolar cation/proton exchanger 3 mRNA, complete cds [NM_115045]                                                                      | 3.75                                 | NM_115045 |
| 23   | Arabidopsis thaliana cysteine-rich receptor-like protein kinase 4 mRNA, complete cds [NM_114455]                                                            | 3.73                                 | NM_114455 |
| 24   | Arabidopsis thaliana glucose-6-phosphate/phosphate translocator 2 mRNA, complete cds [NM_104862]                                                            | 3.72                                 | NM_104862 |
| 25   | Arabidopsis thaliana cytochrome P450, family 76, subfamily C, polypeptide 6 mRNA, complete cds [NM_103092]                                                  | 3.68                                 | NM_103092 |
| 26   | Arabidopsis thaliana uncharacterized protein mRNA, complete cds [NM_102532]                                                                                 | 3.65                                 | NM_102532 |
| 27   | Arabidopsis thaliana chaperone DnaJ-domain containing protein mRNA, complete cds [NM_105769]                                                                | 3.63                                 | NM_105769 |
| 28   | Arabidopsis thaliana threonyl-tRNA synthetase mRNA, complete cds [NM_101659]                                                                                | 3.54                                 | NM_101659 |
| 29   | Arabidopsis thaliana bifunctional inhibitor/lipid-transfer protein/seed storage 2S albumin-like protein mRNA, complete cds [NM_104930]                      | 3.49                                 | NM_104930 |
| 30   | Arabidopsis thaliana putative calcium-binding protein CML41 mRNA, complete cds [NM_114937]                                                                  | 3.45                                 | NM_114937 |
| 31   | Arabidopsis thaliana glucose-6-phosphate/phosphate translocator 2 mRNA, complete cds [NM_104862]                                                            | 3.44                                 | NM_104862 |
| 32   | Arabidopsis thaliana receptor like protein 41 mRNA, complete cds [NM_113405]                                                                                | 3.42                                 | NM_113405 |
| 33   | Arabidopsis thaliana uncharacterized protein mRNA, complete cds [NM_101075]                                                                                 | 3.39                                 | NM_101075 |
| 34   | Arabidopsis thaliana pathogenesis-related protein 5 mRNA, complete cds [NM_106161]                                                                          | 3.39                                 | NM_106161 |
| 35   | Arabidopsis thaliana receptor like protein 28 mRNA, complete cds [NM_128868]                                                                                | 3.37                                 | NM_128868 |
| 36   | Arabidopsis thaliana aspartyl protease family protein mRNA, complete cds [NM_121114]                                                                        | 3.34                                 | NM_121114 |
| 37   | Arabidopsis thaliana putative galactinol-sucrose galactosyltransferase 6 mRNA, complete cds [NM_001036833]                                                  | 3.30                                 | NM_001036 |
| 38   | Arabidopsis thaliana putative E3 ligase BRUTUS mRNA, complete cds [NM_112713]                                                                               | 3.22                                 | NM_112713 |
| 39   | Arabidopsis thaliana unknown protein (At1g03580) mRNA, partial cds [AY091013]                                                                               | 3.21                                 | AY091013  |
| 40   | Arabidopsis thaliana ABC transporter G family member 40 mRNA, complete cds [NM_101421]                                                                      | 3.20                                 | NM_101421 |
| 41   | 104265 CERES-148 Arabidopsis thaliana cDNA clone 11227 3', mRNA sequence [DR371761]                                                                         | 3.16                                 | DR371761  |
| 42   | Arabidopsis thaliana uncharacterized protein mRNA, complete cds [NM_117454]                                                                                 | 3.15                                 | NM_117454 |
| 43   | Arabidopsis thaliana glutamate dehydrogenase 2 mRNA, complete cds [NM_001125712]                                                                            | 3.14                                 | NM_001125 |
| 44   | Arabidopsis thaliana uncharacterized protein mRNA, complete cds [NM_001125900]                                                                              | 3.13                                 | NM_001125 |
| 45   | Arabidopsis thaliana glycerophosphoryl diester phosphodiesterase family protein mRNA, complete cds [NM_203136]                                              | 3.12                                 | NM_203136 |
| 46   | Arabidopsis thaliana asparagine synthetase [glutamine-hydrolyzing] mRNA, complete cds [NM_180333]                                                           | 3.11                                 | NM_180333 |
| 47   | Arabidopsis thaliana putative cysteine-rich receptor-like protein kinase 23 mRNA, complete cds [NM_118460]                                                  | 3.11                                 | NM_118460 |
| 48   | Arabidopsis thaliana carbohydrate-binding X8 domain-containing protein mRNA, complete cds [NM_105358]                                                       | 3.11                                 | NM_105358 |
| 49   | Arabidopsis thaliana uncharacterized protein mRNA, complete cds [NM_127631]                                                                                 | 3.10                                 | NM_127631 |
| 50   | Arabidopsis thaliana putative galactinol-sucrose galactosyltransferase 6 mRNA, complete cds [NM_001036833]                                                  | 3.10                                 | NM_001036 |
| 51   | Arabidopsis thaliana uncharacterized protein mRNA, complete cds [NM_113988]                                                                                 | 3.09                                 | NM_113988 |
| 52   | Arabidopsis thaliana uncharacterized protein mRNA, complete cds [NM_001124821]                                                                              | 3.08                                 | NM_001124 |
| 53   | Arabidopsis thaliana TRAF-like family protein mRNA, complete cds [NM_116369]                                                                                | 3.08                                 | NM_116369 |
| 54   | Arabidopsis thaliana Inositol monophosphatase family protein mRNA, complete cds [NM_120965]                                                                 | 3.06                                 | NM_120965 |
| 55   | Arabidopsis thaliana cyclic nucleotide-gated channel 14 mRNA, complete cds [NM_179725]                                                                      | 3.05                                 | NM_179725 |
| 56   | Arabidopsis thaliana receptor like protein 23 mRNA, complete cds [NM_128827]                                                                                | 3.04                                 | NM_128827 |
| 57   | Arabidopsis thaliana phosphoglucan, water dikinase mRNA, complete cds [NM_001125808]                                                                        | 3.03                                 | NM_001125 |
| 58   | Arabidopsis thaliana cysteine-rich receptor-like protein kinase 36 mRNA, complete cds [NM_116687]                                                           | 2.99                                 | NM_116687 |
| 59   | Arabidopsis thaliana receptor like protein 23 mRNA, complete cds [NM_128827]                                                                                | 2.96                                 | NM_128827 |
| 60   | Arabidopsis thaliana tricyclic synthase mRNA, complete cds [NM_001036574]                                                                                   | 2.92                                 | NM_001036 |
| 61   | Arabidopsis thaliana uncharacterized protein mRNA, complete cds [NM_001203978]                                                                              | 2.91                                 | NM_001203 |
| 62   | Arabidopsis thaliana uncharacterized protein mRNA, complete cds [NM_202810]                                                                                 | 2.88                                 | NM_202810 |
| 63   | Arabidopsis thaliana uncharacterized protein mRNA, complete cds [NM_101075]                                                                                 | 2.88                                 | NM_101075 |
| 64   | Arabidopsis thaliana Leucine-rich repeat (LRR) family protein mRNA, complete cds [NM_001161047]                                                             | 2.87                                 | NM_001161 |
| 65   | Arabidopsis thaliana clone asmb1_2759 defensin-like mRNA sequence [EF182842]                                                                                | 2.86                                 | EF182842  |
| 66   | Arabidopsis thaliana uncharacterized protein mRNA, complete cds [NM_119559]                                                                                 | 2.86                                 | NM_119559 |
| 67   | Arabidopsis thaliana glycerophosphoryl diester phosphodiesterase family protein mRNA, complete cds [NM_203136]                                              | 2.80                                 | NM_203136 |
| 68   | Arabidopsis thaliana uncharacterized protein mRNA, complete cds [NM_179449]                                                                                 | 2.79                                 | NM_179449 |
| 69   | Arabidopsis thaliana protein MOTHER of FT and TF 1 mRNA, complete cds [NM_101672]                                                                           | 2.79                                 | NM_101672 |
| 70   | Arabidopsis thaliana phloem protein 2-A13 mRNA, complete cds [NM_202741]                                                                                    | 2.79                                 | NM_202741 |
| 71   | Arabidopsis thaliana GHMP kinase family protein mRNA, complete cds [NM_121451]                                                                              | 2.77                                 | NM_121451 |
| 72   | Arabidopsis thaliana cytochrome P450, family 76, subfamily C, polypeptide 6 mRNA, complete cds [NM_103092]                                                  | 2.76                                 | NM_103092 |
| 73   | Arabidopsis thaliana calmodulin-like protein 8 mRNA, complete cds [NM_117546]                                                                               | 2.73                                 | NM_117546 |
| 74   | Arabidopsis thaliana FLG22-induced receptor-like kinase 1 mRNA, complete cds [NM_127476]                                                                    | 2.73                                 | NM_127476 |
| 75   | Arabidopsis thaliana proline dehydrogenase 1 mRNA, complete cds [NM_113981]                                                                                 | 2.72                                 | NM_113981 |
| 76   | Arabidopsis thaliana uncharacterized protein mRNA, complete cds [NM_202299]                                                                                 | 2.72                                 | NM_202299 |
| 77   | Arabidopsis thaliana uncharacterized protein mRNA, complete cds [NM_117454]                                                                                 | 2.71                                 | NM_117454 |
| 78   | Arabidopsis thaliana uncharacterized protein mRNA, complete cds [NM_001085016]                                                                              | 2.71                                 | NM_001085 |
| 79   | Arabidopsis thaliana auxin efflux carrier family protein mRNA, complete cds [NM_106303]                                                                     | 2.71                                 | NM_106303 |
| 80   | Arabidopsis thaliana E3 ubiquitin-protein ligase RMA1 mRNA, complete cds [NM_202777]                                                                        | 2.69                                 | NM_202777 |
| 81   | Arabidopsis thaliana isovaleryl-CoA-dehydrogenase mRNA, complete cds [NM_114399]                                                                            | 2.69                                 | NM_114399 |
| 82   | Arabidopsis thaliana putative pectin methylesterase/invertase inhibitor mRNA, complete cds [NM_100953]                                                      | 2.68                                 | NM_100953 |
| 83   | Arabidopsis thaliana vesicle-associated protein 1-4 mRNA, complete cds [NM_104005]                                                                          | 2.68                                 | NM_104005 |
| 84   | Arabidopsis thaliana putative galactinol-sucrose galactosyltransferase 2 mRNA, complete cds [NM_115612]                                                     | 2.67                                 | NM_115612 |
| 85   | BP661111 RAFL21 Arabidopsis thaliana cDNA clone RAFL21-04-K10 3', mRNA sequence [BP661111]                                                                  | 2.67                                 | BP661111  |
| 86   | Arabidopsis thaliana receptor kinase 3 mRNA, complete cds [NM_118258]                                                                                       | 2.65                                 | NM_118258 |
| 87   | Arabidopsis thaliana putative 2OG-Fe(II) oxygenase mRNA, complete cds [NM_122361]                                                                           | 2.65                                 | NM_122361 |
| 88   | Arabidopsis thaliana ring finger and CHY zinc finger domain-containing protein 1 mRNA, complete cds [NM_122198]                                             | 2.65                                 | NM_122198 |
| 89   | Arabidopsis thaliana pollen Ole e 1 allergen and extensin family protein mRNA, complete cds [NM_130322]                                                     | 2.64                                 | NM_130322 |
| 90   | AYBMB33TR pooled cDNA populations Arabidopsis thaliana cDNA, mRNA sequence [EG514269]                                                                       | 2.64                                 | EG514269  |
| 91   | Arabidopsis thaliana uncharacterized protein mRNA, complete cds [NM_106347]                                                                                 | 2.63                                 | NM_106347 |
| 92   | Arabidopsis thaliana putative galactinol-sucrose galactosyltransferase 6 mRNA, complete cds [NM_001036833]                                                  | 2.63                                 | NM_001036 |
| 93   | Arabidopsis thaliana uncharacterized protein mRNA, complete cds [NM_126931]                                                                                 | 2.62                                 | NM_126931 |
| 94   | Arabidopsis thaliana UDP-dependent glycosyltransferase 76B1 mRNA, complete cds [NM_111968]                                                                  | 2.62                                 | NM_111968 |
| 95   | Arabidopsis thaliana NB-ARC domain-containing disease resistance protein mRNA, complete cds [NM_118856]                                                     | 2.61                                 | NM_118856 |
| 96   | Arabidopsis thaliana MATE efflux family protein mRNA, complete cds [NM_106029]                                                                              | 2.60                                 | NM_106029 |
| 97   | AV566399 Arabidopsis thaliana green silques Columbia Arabidopsis thaliana cDNA clone SQ242110F 3', mRNA sequence [AV566399]                                 | 2.60                                 | AV566399  |
| 98   | Arabidopsis thaliana protochlorophyllide reductase A mRNA, complete cds [NM_124799]                                                                         | 2.59                                 | NM_124799 |
| 99   | Arabidopsis thaliana cysteine-rich receptor-like protein kinase 6 mRNA, complete cds [NM_179095]                                                            | 2.59                                 | NM_179095 |
| 100  | Arabidopsis thaliana pseudo-response regulator 7 mRNA, complete cds [NM_120359]                                                                             | 2.58                                 | NM_120359 |

Table S2. Top100 up-regulated genes in Arabidopsis treated by 3-hexenol

| Rank | Description                                                                                         | Fold change (Log <sub>2</sub> ratio) | Accession    |
|------|-----------------------------------------------------------------------------------------------------|--------------------------------------|--------------|
| 1    | Arabidopsis thaliana putative chitinase mRNA, complete cds [NM_129919]                              | 4.74                                 | NM_129919    |
| 2    | Arabidopsis thaliana core-2/1-branching beta-1,6-N-acetylglucosaminyltransferase-like protein m     | 4.62                                 | NM_104189    |
| 3    | Arabidopsis thaliana chaperone DnaJ-domain containing protein mRNA, complete cds [NM_105            | 4.51                                 | NM_105769    |
| 4    | Arabidopsis thaliana nodulin MN21-like transporter family protein mRNA, complete cds [NM_11         | 4.37                                 | NM_118943    |
| 5    | Arabidopsis thaliana plant natriuretic peptide A mRNA, complete cds [NM_179648]                     | 4.27                                 | NM_179648    |
| 6    | 12826078 CERES-AN65 Arabidopsis thaliana cDNA clone 1361839 5', mRNA sequence [DR36f                | 4.19                                 | DR368472     |
| 7    | Arabidopsis thaliana terpene synthase 10 mRNA, complete cds [NM_127982]                             | 3.89                                 | NM_127982    |
| 8    | Arabidopsis thaliana glucose-6-phosphate/phosphate translocator 2 mRNA, complete cds [NM_           | 3.80                                 | NM_104862    |
| 9    | Arabidopsis thaliana beta 1,3-glucanase 2 mRNA, complete cds [NM_115586]                            | 3.76                                 | NM_115586    |
| 10   | Arabidopsis thaliana ROTUNDIFOLIA like 21 protein mRNA, complete cds [NM_001084313]                 | 3.76                                 | NM_001084313 |
| 11   | AYAXN56TF pooled cDNA populations Arabidopsis thaliana cDNA, mRNA sequence [EG52547:                | 3.70                                 | EG525475     |
| 12   | GB transposable element gene                                                                        | 3.68                                 | NP456970     |
| 13   | Arabidopsis thaliana bifunctional inhibitor/lipid-transfer protein/seed storage 2S albumin-like pro | 3.66                                 | NM_104930    |
| 14   | Arabidopsis thaliana TRAF-like family protein mRNA, complete cds [NM_116369]                        | 3.62                                 | NM_116369    |
| 15   | Arabidopsis thaliana uncharacterized protein mRNA, complete cds [NM_122326]                         | 3.61                                 | NM_122326    |
| 16   | Arabidopsis thaliana methionine sulfoxide reductase B8 mRNA, complete cds [NM_118304]               | 3.41                                 | NM_118304    |
| 17   | Arabidopsis thaliana cysteine-rich receptor-like protein kinase 4 mRNA, complete cds [NM_1144       | 3.38                                 | NM_114455    |
| 18   | Arabidopsis thaliana glucose-6-phosphate/phosphate translocator 2 mRNA, complete cds [NM_           | 3.38                                 | NM_104862    |
| 19   | Rep: Cysteine-rich receptor-like protein kinase 19 precursor - Arabidopsis thaliana (Mouse-ear c    | 3.32                                 | T43643       |
| 20   | Rep: Asparagine synthetase [glutamine-hydrolyzing] - Sandersonia aurantiaca (Christmas-bells)       | 3.30                                 | TA29936_3702 |
| 21   | Arabidopsis thaliana receptor like protein 33 mRNA, complete cds [NM_111439]                        | 3.23                                 | NM_111439    |
| 22   | Arabidopsis thaliana uncharacterized protein mRNA, complete cds [NM_125622]                         | 3.22                                 | NM_125622    |
| 23   | Arabidopsis thaliana histidine-containing phosphotransfer protein 4 mRNA, complete cds [NM_1        | 3.20                                 | NM_112507    |
| 24   | Arabidopsis thaliana receptor like protein 33 mRNA, complete cds [NM_111439]                        | 3.18                                 | NM_111439    |
| 25   | Arabidopsis thaliana putative galactinol--sucrose galactosyltransferase 6 mRNA, complete cds [      | 3.17                                 | NM_001036833 |
| 26   | Rep: SRKb - Arabidopsis lyrata (Lyre-leaved rock-cress), partial (13%) [TC391578]                   | 3.13                                 | TC391578     |
| 27   | Arabidopsis thaliana unknown protein (A1g03580) mRNA, partial cds [AY091013]                        | 3.09                                 | AY091013     |
| 28   | Arabidopsis thaliana Inositol monophosphatase family protein mRNA, complete cds [NM_12096           | 3.07                                 | NM_120965    |
| 29   | Arabidopsis thaliana Ran BP2/NZF zinc finger-like protein mRNA, complete cds [NM_201808]            | 3.04                                 | NM_201808    |
| 30   | Rep: Lipoprotein-releasing system ATP-binding protein lOid - Treponema denticola, partial (6%)      | 3.03                                 | BP583159     |
| 31   | Arabidopsis thaliana asparagine synthetase [glutamine-hydrolyzing] mRNA, complete cds [NM_          | 3.02                                 | NM_180333    |
| 32   | Arabidopsis thaliana ribonuclease 1 mRNA, complete cds [NM_126351]                                  | 2.99                                 | NM_126351    |
| 33   | Arabidopsis thaliana isovaleryl-CoA-dehydrogenase mRNA, complete cds [NM_114399]                    | 2.99                                 | NM_114399    |
| 34   | Arabidopsis thaliana Full-length cDNA complete sequence from clone GSLTPGH78ZH03 of Ho              | 2.99                                 | BX832525     |
| 35   | 104265 CERES-148 Arabidopsis thaliana cDNA clone 11227 3', mRNA sequence [DR371761]                 | 2.99                                 | DR371761     |
| 36   | Arabidopsis thaliana uncharacterized protein mRNA, complete cds [NM_117454]                         | 2.97                                 | NM_117454    |
| 37   | Arabidopsis thaliana putative pectin methyltransferase/invertase inhibitor mRNA, complete cds [N    | 2.94                                 | NM_100953    |
| 38   | Arabidopsis thaliana uncharacterized protein mRNA, complete cds [NM_102532]                         | 2.94                                 | NM_102532    |
| 39   | Arabidopsis thaliana chaperone DnaJ-domain containing protein mRNA, complete cds [NM_112            | 2.93                                 | NM_112176    |
| 40   | Arabidopsis thaliana tricyclic synthase mRNA, complete cds [NM_001036574]                           | 2.93                                 | NM_001036574 |
| 41   | Arabidopsis thaliana cytochrome P450, family 76, subfamily C, polypeptide 6 mRNA, complete          | 2.92                                 | NM_103092    |
| 42   | Arabidopsis thaliana chaperone DnaJ-domain containing protein mRNA, complete cds [NM_001            | 2.91                                 | NM_001036191 |
| 43   | Arabidopsis thaliana plastocyanin-like domain-containing protein mRNA, complete cds [NM_11f         | 2.87                                 | NM_116368    |
| 44   | Arabidopsis thaliana putative galactinol--sucrose galactosyltransferase 6 mRNA, complete cds [      | 2.87                                 | NM_001036833 |
| 45   | Arabidopsis thaliana glutamate dehydrogenase 2 mRNA, complete cds [NM_001125712]                    | 2.83                                 | NM_001125712 |
| 46   | BP661111 RAFL21 Arabidopsis thaliana cDNA clone RAFL21-04-K10 3', mRNA sequence [BP6                | 2.77                                 | BP661111     |
| 47   | Arabidopsis thaliana cysteine-rich receptor-like protein kinase 7 mRNA, complete cds [NM_1184       | 2.77                                 | NM_118444    |
| 48   | Arabidopsis thaliana uncharacterized protein mRNA, complete cds [NM_127631]                         | 2.75                                 | NM_127631    |
| 49   | Arabidopsis thaliana phosphoglucan, water dikinase mRNA, complete cds [NM_001125808]                | 2.74                                 | NM_001125808 |
| 50   | Arabidopsis thaliana Haloacid dehalogenase-like hydrolase (HAD) superfamily protein mRNA, c         | 2.73                                 | NM_129210    |
| 51   | Arabidopsis thaliana heat shock protein 70-4 mRNA, complete cds [NM_112093]                         | 2.70                                 | NM_112093    |
| 52   | Arabidopsis thaliana phloem protein 2-A13 mRNA, complete cds [NM_202741]                            | 2.69                                 | NM_202741    |
| 53   | AV566399 Arabidopsis thaliana green siliques Columbia Arabidopsis thaliana cDNA clone SQ24          | 2.65                                 | AV566399     |
| 54   | Rep: Chromosome chr14 scaffold_9, whole genome shotgun sequence - Vitis vinifera (Grape), f         | 2.64                                 | TA29106_3702 |
| 55   | Arabidopsis thaliana carboxylate clamp-tetrapeptide repeat protein mRNA, complete cds [N            | 2.64                                 | NM_117310    |
| 56   | Arabidopsis thaliana putative galactinol--sucrose galactosyltransferase 2 mRNA, complete cds [      | 2.64                                 | NM_115612    |
| 57   | Arabidopsis thaliana CBL-interacting serine/threonine-protein kinase 25 mRNA, complete cds [N       | 2.59                                 | NM_122420    |
| 58   | Arabidopsis thaliana dicarboxylate carrier 3 mRNA, complete cds [NM_120984]                         | 2.59                                 | NM_120984    |
| 59   | Arabidopsis thaliana chaperone DnaJ-domain containing protein mRNA, complete cds [NM_001            | 2.59                                 | NM_001124117 |
| 60   | Arabidopsis thaliana receptor kinase 3 mRNA, complete cds [NM_118258]                               | 2.59                                 | NM_118258    |
| 61   | Arabidopsis thaliana clone asml_2759 defensin-like mRNA sequence [EF182842]                         | 2.59                                 | EF182842     |
| 62   | Arabidopsis thaliana uncharacterized protein mRNA, complete cds [NM_001203978]                      | 2.58                                 | NM_001203978 |
| 63   | Arabidopsis thaliana Leucine-rich repeat (LRR) family protein mRNA, complete cds [NM_00116          | 2.58                                 | NM_001161047 |
| 64   | Arabidopsis thaliana serine carboxypeptidase-like 34 mRNA, complete cds [NM_001085147]              | 2.58                                 | NM_001085147 |
| 65   | Arabidopsis thaliana phototropic-responsive NPH3 family protein mRNA, complete cds [NM_11f          | 2.55                                 | NM_112875    |
| 66   | Arabidopsis thaliana uncharacterized protein mRNA, complete cds [NM_119559]                         | 2.55                                 | NM_119559    |
| 67   | Arabidopsis thaliana putative galactinol--sucrose galactosyltransferase 6 mRNA, complete cds [      | 2.55                                 | NM_001036833 |
| 68   | Arabidopsis thaliana heat stress transcription factor A-2 mRNA, complete cds [NM_001124916]         | 2.55                                 | NM_001124916 |
| 69   | Arabidopsis thaliana uncharacterized protein mRNA, complete cds [NM_117454]                         | 2.54                                 | NM_117454    |
| 70   | Arabidopsis thaliana uncharacterized protein mRNA, complete cds [NM_105710]                         | 2.53                                 | NM_105710    |
| 71   | Arabidopsis thaliana transcription factor bHLH100 mRNA, complete cds [NM_129689]                    | 2.52                                 | NM_129689    |
| 72   | Arabidopsis thaliana uncharacterized protein mRNA, complete cds [NM_113988]                         | 2.52                                 | NM_113988    |
| 73   | Arabidopsis thaliana aspartyl protease family protein mRNA, complete cds [NM_121114]                | 2.50                                 | NM_121114    |
| 74   | Arabidopsis thaliana 3'(2),5'-bisphosphate nucleotidase mRNA, complete cds [NM_125796]              | 2.50                                 | NM_125796    |
| 75   | Arabidopsis thaliana alpha-amylase 1 mRNA, complete cds [NM_118632]                                 | 2.50                                 | NM_118632    |
| 76   | Arabidopsis thaliana putative galactinol--sucrose galactosyltransferase 6 mRNA, complete cds [      | 2.50                                 | NM_001036833 |
| 77   | Arabidopsis thaliana serine-rich protein-like protein mRNA, complete cds [NM_180741]                | 2.49                                 | NM_180741    |
| 78   | Arabidopsis thaliana dehydration-responsive element-binding protein 2C mRNA, complete cds [         | 2.48                                 | NM_129594    |
| 79   | Arabidopsis thaliana uncharacterized protein mRNA, complete cds [NM_112001]                         | 2.46                                 | NM_112001    |
| 80   | Arabidopsis thaliana transcription repressor KAN1 mRNA, complete cds [NM_121662]                    | 2.46                                 | NM_121662    |
| 81   | Arabidopsis thaliana mRNA, clone: RAFL17-50-E02 [AK117807]                                          | 2.45                                 | AK117807     |
| 82   | Arabidopsis thaliana histone H1-3 mRNA, complete cds [NM_127361]                                    | 2.45                                 | NM_127361    |
| 83   | Arabidopsis thaliana putative galactinol--sucrose galactosyltransferase 6 mRNA, complete cds [      | 2.44                                 | NM_001036833 |
| 84   | Arabidopsis thaliana pseudo-response regulator 7 mRNA, complete cds [NM_120359]                     | 2.44                                 | NM_120359    |
| 85   | Arabidopsis thaliana E3 ubiquitin-protein ligase RMA1 mRNA, complete cds [NM_202777]                | 2.44                                 | NM_202777    |
| 86   | Arabidopsis thaliana mRNA, clone: RAFL16-71-J15 [AK117171]                                          | 2.42                                 | AK117171     |
| 87   | Arabidopsis thaliana MATE efflux family protein mRNA, complete cds [NM_106029]                      | 2.41                                 | NM_106029    |
| 88   | Arabidopsis thaliana uncharacterized protein mRNA, complete cds [NM_113959]                         | 2.41                                 | NM_113959    |
| 89   | Arabidopsis thaliana Basic-leucine zipper (bZIP) transcription factor family protein mRNA, comp     | 2.41                                 | NM_119756    |
| 90   | Arabidopsis thaliana asparagine synthetase [glutamine-hydrolyzing] mRNA, complete cds [NM_          | 2.40                                 | NM_180333    |
| 91   | Arabidopsis thaliana carboxylate clamp-tetrapeptide repeat protein mRNA, complete cds [N            | 2.40                                 | NM_001036543 |
| 92   | Arabidopsis thaliana putative galactinol--sucrose galactosyltransferase 6 mRNA, complete cds [      | 2.40                                 | NM_001036833 |
| 93   | Arabidopsis thaliana PB1_UP2 domain-containing protein mRNA, complete cds [NM_113558]               | 2.40                                 | NM_113558    |
| 94   | Arabidopsis thaliana uncharacterized protein mRNA, complete cds [NM_117693]                         | 2.40                                 | NM_117693    |
| 95   | Arabidopsis thaliana proline dehydrogenase 1 mRNA, complete cds [NM_113981]                         | 2.40                                 | NM_113981    |
| 96   | Arabidopsis thaliana peptidyl-prolyl cis-trans isomerase FKBP65 mRNA, complete cds [NM_124          | 2.40                                 | NM_124233    |
| 97   | 205a18.p1 AtM1 Arabidopsis thaliana cDNA clone MPMGp2011A18205 5-PRIME, mRNA sequ                   | 2.39                                 | CK121013     |
| 98   | Arabidopsis thaliana UDP-dependent glycosyltransferase 76B1 mRNA, complete cds [NM_1119             | 2.38                                 | NM_111968    |
| 99   | Arabidopsis thaliana auxin-like 1 protein mRNA, complete cds [NM_106186]                            | 2.37                                 | NM_106186    |
| 100  | Arabidopsis thaliana root meristem growth factor 5 mRNA, complete cds [NM_001125942]                | 2.37                                 | NM_001125942 |

**Table S3.** Top100 up-regulated genes in Arabidopsis treated by 2-hexenal

| Rank | Description                                                                                               | Fold change (Log2 Ratio) | Accession    |
|------|-----------------------------------------------------------------------------------------------------------|--------------------------|--------------|
| 1    | Arabidopsis thaliana chaperone DnaJ-domain containing protein mRNA, complete cds [NM_105769]              | 10.21                    | NM_105769    |
| 2    | Arabidopsis thaliana HSP20-like chaperone mRNA, complete cds [NM_104679]                                  | 8.45                     | NM_104679    |
| 3    | Arabidopsis thaliana class I heat shock protein mRNA, complete cds [NM_100614]                            | 8.42                     | NM_100614    |
| 4    | Arabidopsis thaliana HSP20 family protein mRNA, complete cds [NM_128504]                                  | 8.17                     | NM_128504    |
| 5    | Arabidopsis thaliana heat shock protein 23.5 mRNA, complete cds [NM_124523]                               | 8.15                     | NM_124523    |
| 6    | Arabidopsis thaliana heat stress transcription factor A-2 mRNA, complete cds [NM_001124916]               | 7.70                     | NM_001124916 |
| 7    | Arabidopsis thaliana chaperone protein ClpB1 mRNA, complete cds [NM_106091]                               | 7.50                     | NM_106091    |
| 8    | Arabidopsis thaliana uncharacterized protein mRNA, complete cds [NM_001125962]                            | 7.44                     | NM_001125962 |
| 9    | Arabidopsis thaliana heat shock protein 70B mRNA, complete cds [NM_101471]                                | 7.42                     | NM_101471    |
| 10   | Arabidopsis thaliana BCL-2-associated athanogene 6 mRNA, complete cds [NM_130187]                         | 7.31                     | NM_130187    |
| 11   | Arabidopsis thaliana BCL-2-associated athanogene 6 mRNA, complete cds [NM_130187]                         | 7.05                     | NM_130187    |
| 12   | Arabidopsis thaliana BCL-2-associated athanogene 6 mRNA, complete cds [NM_130187]                         | 7.03                     | NM_130187    |
| 13   | Arabidopsis thaliana carboxylate clamp-tetratricopeptide repeat protein mRNA, complete cds [NM_001117310] | 7.01                     | NM_001036543 |
| 14   | Arabidopsis thaliana carboxylate clamp-tetratricopeptide repeat protein mRNA, complete cds [NM_117310]    | 6.97                     | NM_117310    |
| 15   | Arabidopsis thaliana heat-shock protein 70T-2 mRNA, complete cds [NM_128771]                              | 6.82                     | NM_128771    |
| 16   | Arabidopsis thaliana uncharacterized protein mRNA, complete cds [NM_120604]                               | 6.75                     | NM_120604    |
| 17   | Arabidopsis thaliana uncharacterized protein mRNA, complete cds [NM_179014]                               | 6.70                     | NM_179014    |
| 18   | Arabidopsis thaliana heat shock protein 90.1 mRNA, complete cds [NM_124642]                               | 6.57                     | NM_124642    |
| 19   | Arabidopsis thaliana peptidyl-prolyl cis-trans isomerase FKBP65 mRNA, complete cds [NM_124233]            | 6.47                     | NM_124233    |
| 20   | Arabidopsis thaliana cytochrome bd ubiquinol oxidase mRNA, complete cds [NM_122455]                       | 6.28                     | NM_122455    |
| 21   | Arabidopsis thaliana heat shock protein 70-4 mRNA, complete cds [NM_112093]                               | 6.23                     | NM_112093    |
| 22   | Arabidopsis thaliana heat shock protein 15.7 mRNA, complete cds [NM_123126]                               | 6.16                     | NM_123126    |
| 23   | Arabidopsis thaliana dehydration-responsive element-binding protein 2A mRNA, complete cds [NM_120623]     | 6.11                     | NM_120623    |
| 24   | Arabidopsis thaliana J domain protein ATERDJ3A mRNA, complete cds [NM_111731]                             | 6.10                     | NM_111731    |
| 25   | Arabidopsis thaliana GHMP kinase family protein mRNA, complete cds [NM_121451]                            | 6.09                     | NM_121451    |
| 26   | Arabidopsis thaliana NAC domain-containing protein 4 mRNA, complete cds [NM_100104]                       | 6.09                     | NM_100104    |
| 27   | Arabidopsis thaliana protein TUNICAMYCIN INDUCED 1 mRNA, complete cds [NM_125847]                         | 6.04                     | NM_125847    |
| 28   | Arabidopsis thaliana DNAJ heat shock family protein mRNA, complete cds [NM_127616]                        | 6.03                     | NM_127616    |
| 29   | Arabidopsis thaliana UDP-glucosyltransferase 73C5 mRNA, complete cds [NM_129235]                          | 5.76                     | NM_129235    |
| 30   | Arabidopsis thaliana UDP-glucosyltransferase 73B4 mRNA, complete cds [NM_201740]                          | 5.73                     | NM_201740    |
| 31   | Arabidopsis thaliana zinc finger protein ZAT11 mRNA, complete cds [NM_129298]                             | 5.72                     | NM_129298    |
| 32   | Arabidopsis thaliana dehydration-responsive element-binding protein 2A mRNA, complete cds [NM_001036760]  | 5.70                     | NM_001036760 |
| 33   | Arabidopsis thaliana DNAJ heat shock family protein mRNA, complete cds [NM_127616]                        | 5.62                     | NM_127616    |
| 34   | Arabidopsis thaliana protein Fes1A mRNA, complete cds [NM_001161128]                                      | 5.62                     | NM_001161128 |
| 35   | Arabidopsis thaliana heat shock protein 90.1 mRNA, complete cds [NM_124642]                               | 5.61                     | NM_124642    |
| 36   | Arabidopsis thaliana UDP-glucosyl transferase 73B5 mRNA, complete cds [NM_001202599]                      | 5.60                     | NM_001202599 |
| 37   | Arabidopsis thaliana uncharacterized protein mRNA, complete cds [NM_121477]                               | 5.53                     | NM_121477    |
| 38   | Arabidopsis thaliana putative calcium-binding protein CML44 mRNA, complete cds [NM_102004]                | 5.53                     | NM_102004    |
| 39   | Arabidopsis thaliana protein Fes1A mRNA, complete cds [NM_001161128]                                      | 5.50                     | NM_001161128 |
| 40   | Arabidopsis thaliana UDP-glucosyl transferase 73B5 mRNA, complete cds [NM_127108]                         | 5.50                     | NM_127108    |
| 41   | Arabidopsis thaliana protein lifeguard 4 mRNA, complete cds [NM_001197967]                                | 5.48                     | NM_001197967 |
| 42   | Arabidopsis thaliana dehydration-responsive element-binding protein 2A mRNA, complete cds [NM_001036760]  | 5.41                     | NM_001036760 |
| 43   | Arabidopsis thaliana CIII heat shock protein 17.4 mRNA, complete cds [NM_104282]                          | 5.39                     | NM_104282    |
| 44   | Arabidopsis thaliana uncharacterized protein mRNA, complete cds [NM_118479]                               | 5.29                     | NM_118479    |
| 45   | Arabidopsis thaliana cytochrome P450 CYP81D11 mRNA, complete cds [NM_113795]                              | 5.26                     | NM_113795    |
| 46   | Arabidopsis thaliana S2P-like putative metalloprotease mRNA, complete cds [NM_101650]                     | 5.17                     | NM_101650    |
| 47   | Arabidopsis thaliana multiprotein-bridging factor 1c mRNA, complete cds [NM_113358]                       | 5.03                     | NM_113358    |
| 48   | Arabidopsis thaliana dehydration-responsive element-binding protein 2C mRNA, complete cds [NM_129594]     | 5.02                     | NM_129594    |
| 49   | Arabidopsis thaliana NAC domain-containing protein 102 mRNA, complete cds [NM_125774]                     | 4.95                     | NM_125774    |
| 50   | Arabidopsis thaliana tolB-related protein mRNA, complete cds [NM_116417]                                  | 4.94                     | NM_116417    |
| 51   | Arabidopsis thaliana UDP-glucosyl transferase 73B3 mRNA, complete cds [NM_119574]                         | 4.89                     | NM_119574    |
| 52   | Arabidopsis thaliana AGC (cAMP-dependent, cGMP-dependent and protein kinase C) kinase family pr           | 4.88                     | NM_113431    |
| 53   | Arabidopsis thaliana atypical dual-specificity phosphatase mRNA, complete cds [NM_111148]                 | 4.79                     | NM_111148    |
| 54   | Arabidopsis thaliana uncharacterized protein mRNA, complete cds [NM_100437]                               | 4.78                     | NM_100437    |
| 55   | Arabidopsis thaliana uncharacterized protein mRNA, complete cds [NM_128753]                               | 4.77                     | NM_128753    |
| 56   | Arabidopsis thaliana SGS domain-containing protein mRNA, complete cds [NM_001198184]                      | 4.76                     | NM_001198184 |
| 57   | Arabidopsis thaliana UDP-glucosyltransferase 73B2 mRNA, complete cds [NM_179161]                          | 4.71                     | NM_179161    |
| 58   | Arabidopsis thaliana glutathione S-transferase TAU 11 mRNA, complete cds [NM_105661]                      | 4.66                     | NM_105661    |
| 59   | Arabidopsis thaliana FAD/NAD(P)-binding oxidoreductase family protein mRNA, complete cds [NM_114287]      | 4.63                     | NM_114287    |
| 60   | Arabidopsis thaliana UDP-glucosyltransferase 73C5 mRNA, complete cds [NM_129235]                          | 4.59                     | NM_129235    |
| 61   | Arabidopsis thaliana FAD/NAD(P)-binding oxidoreductase family protein mRNA, complete cds [NM_147895]      | 4.48                     | NM_147895    |
| 62   | Arabidopsis thaliana NAC domain-containing protein 102 mRNA, complete cds [NM_125774]                     | 4.47                     | NM_125774    |
| 63   | Arabidopsis thaliana high light responsive zinc finger protein ZAT12 mRNA, complete cds [NM_125374]       | 4.41                     | NM_125374    |
| 64   | Arabidopsis thaliana putative pyridoxal biosynthesis protein PDX1.2 mRNA, complete cds [NM_112471]        | 4.40                     | NM_112471    |
| 65   | Arabidopsis thaliana uncharacterized protein mRNA, complete cds [NM_122923]                               | 4.39                     | NM_122923    |
| 66   | Arabidopsis thaliana zinc-binding dehydrogenase family protein mRNA, complete cds [NM_121704]             | 4.32                     | NM_121704    |
| 67   | Arabidopsis thaliana glutathione S-transferase tau 7 mRNA, complete cds [NM_128496]                       | 4.31                     | NM_128496    |
| 68   | Arabidopsis thaliana protein HEAT-STRESS-ASSOCIATED 32 mRNA, complete cds [NM_118250]                     | 4.27                     | NM_118250    |
| 69   | Arabidopsis thaliana tolB-related protein mRNA, complete cds [NM_116417]                                  | 4.24                     | NM_116417    |
| 70   | Arabidopsis thaliana protein HEAT-STRESS-ASSOCIATED 32 mRNA, complete cds [NM_118250]                     | 4.24                     | NM_118250    |
| 71   | Arabidopsis thaliana serine acetyltransferase 1 mRNA, complete cds [NM_104470]                            | 4.11                     | NM_104470    |
| 72   | Arabidopsis thaliana glutaredoxin ATGRXS13 mRNA, complete cds [NM_179255]                                 | 4.09                     | NM_179255    |
| 73   | Arabidopsis thaliana glutaredoxin ATGRXS13 mRNA, complete cds [NM_100265]                                 | 4.07                     | NM_100265    |
| 74   | Arabidopsis thaliana NAC domain containing protein 32 mRNA, complete cds [NM_106394]                      | 4.07                     | NM_106394    |
| 75   | Arabidopsis thaliana sigma factor binding protein 1 mRNA, complete cds [NM_115530]                        | 4.06                     | NM_115530    |
| 76   | Rep: Chromosome chr8 scaffold_23, whole genome shotgun sequence - Vitis vinifera (Grape), partial         | 4.05                     | TA27098_3702 |
| 77   | Arabidopsis thaliana RING finger domain-containing protein mRNA, complete cds [NM_101286]                 | 4.03                     | NM_101286    |
| 78   | Arabidopsis thaliana FAD/NAD(P)-binding oxidoreductase family protein mRNA, complete cds [NM_114287]      | 4.02                     | NM_114287    |
| 79   | Arabidopsis thaliana glutathione S-transferase TAU 24 mRNA, complete cds [NM_101578]                      | 3.98                     | NM_101578    |
| 80   | Arabidopsis thaliana DAD1-like acylhydrolase mRNA, complete cds [NM_102774]                               | 3.97                     | NM_102774    |
| 81   | Arabidopsis thaliana ethylene-responsive transcription factor ERF098 mRNA, complete cds [NM_113224]       | 3.96                     | NM_113224    |
| 82   | Arabidopsis thaliana ethylene-responsive transcription factor ERF011 mRNA, complete cds [NM_114886]       | 3.95                     | NM_114886    |
| 83   | Arabidopsis thaliana RING finger domain-containing protein mRNA, complete cds [NM_101286]                 | 3.95                     | NM_101286    |
| 84   | Arabidopsis thaliana 12-oxophytodienoate reductase 1 mRNA, complete cds [NM_106318]                       | 3.94                     | NM_106318    |
| 85   | Arabidopsis thaliana UDP-glucosyl transferase 73C3 mRNA, complete cds [NM_129233]                         | 3.93                     | NM_129233    |
| 86   | Arabidopsis thaliana calcium-binding protein CML37 mRNA, complete cds [NM_123603]                         | 3.93                     | NM_123603    |
| 87   | Arabidopsis thaliana ethylene-responsive transcription factor ERF019 mRNA, complete cds [NM_102128]       | 3.93                     | NM_102128    |
| 88   | Arabidopsis thaliana calcium-binding protein CML37 mRNA, complete cds [NM_123603]                         | 3.91                     | NM_123603    |
| 89   | Arabidopsis thaliana 12-oxophytodienoate reductase 1 mRNA, complete cds [NM_106318]                       | 3.90                     | NM_106318    |
| 90   | Arabidopsis thaliana UDP-glucosyl transferase 73B1 mRNA, complete cds [NM_119576]                         | 3.87                     | NM_119576    |
| 91   | Arabidopsis thaliana HXXXD-type acyl-transferase family protein mRNA, complete cds [NM_120869]            | 3.85                     | NM_120869    |
| 92   | Arabidopsis thaliana zinc finger protein ZAT6 mRNA, complete cds [NM_120516]                              | 3.85                     | NM_120516    |
| 93   | Arabidopsis thaliana HXXXD-type acyl-transferase family protein mRNA, complete cds [NM_120869]            | 3.83                     | NM_120869    |
| 94   | Rep: Chromosome chr18 scaffold_1, whole genome shotgun sequence - Vitis vinifera (Grape), partial         | 3.80                     | TA35940_3702 |
| 95   | Arabidopsis thaliana cytochrome P450, family 89, subfamily A, polypeptide 5 mRNA, complete cds [NI        | 3.80                     | NM_105169    |
| 96   | Arabidopsis thaliana pinoid-binding protein 1 mRNA, complete cds [NM_124829]                              | 3.75                     | NM_124829    |
| 97   | Arabidopsis thaliana putative transcriptional activator with NAC domain mRNA, complete cds [NM_100054]    | 3.72                     | NM_100054    |
| 98   | Arabidopsis thaliana uncharacterized protein mRNA, complete cds [NM_001125163]                            | 3.72                     | NM_001125163 |
| 99   | Arabidopsis thaliana zinc finger protein ZAT8 mRNA, complete cds [NM_114477]                              | 3.70                     | NM_114477    |
| 100  | Arabidopsis thaliana uncharacterized protein mRNA, complete cds [NM_111595]                               | 3.70                     | NM_111595    |

**Table S4.** Top100 up-regulated genes in Arabidopsis treated by 3-hexenyl acetate

| Rank | Description                                                                                                                            | Fold change(Log2 Ratio) | Accession    |
|------|----------------------------------------------------------------------------------------------------------------------------------------|-------------------------|--------------|
| 1    | Arabidopsis thaliana putative chitinase mRNA, complete cds [NM_129919]                                                                 | 6.42                    | NM_129919    |
| 2    | Arabidopsis thaliana methionine sulfoxide reductase B8 mRNA, complete cds [NM_118304]                                                  | 6.10                    | NM_118304    |
| 3    | Arabidopsis thaliana UDP-dependent glycosyltransferase 76B1 mRNA, complete cds [NM_111968]                                             | 5.91                    | NM_111968    |
| 4    | Arabidopsis thaliana plant natriuretic peptide A mRNA, complete cds [NM_179648]                                                        | 5.45                    | NM_179648    |
| 5    | Arabidopsis thaliana ABC transporter G family member 40 mRNA, complete cds [NM_10142]                                                  | 5.37                    | NM_10142     |
| 6    | Arabidopsis thaliana heat shock protein 23.5 mRNA, complete cds [NM_124523]                                                            | 4.94                    | NM_124523    |
| 7    | AYBCW59TFD pooled cDNA populations Arabidopsis thaliana cDNA, mRNA sequence [EG52]                                                     | 4.61                    | EG57803      |
| 8    | Rep: Uncharacterized protein At1g06515.2 - Arabidopsis thaliana (Mouse-ear cross), complete cds [DR28]                                 | 4.50                    | TA36695_3702 |
| 9    | 4515840 CERES-149 Arabidopsis thaliana cDNA clone 1022677 5', mRNA sequence [DR28]                                                     | 4.41                    | DR286735     |
| 10   | AYAXN56TF pooled cDNA populations Arabidopsis thaliana cDNA, mRNA sequence [EG52]                                                      | 4.38                    | EG525475     |
| 11   | Arabidopsis thaliana U-box domain-containing protein 54 mRNA, complete cds [NM_100050]                                                 | 4.35                    | NM_100050    |
| 12   | Arabidopsis thaliana heat shock protein 70-4 mRNA, complete cds [NM_112093]                                                            | 4.34                    | NM_112093    |
| 13   | Arabidopsis thaliana uncharacterized protein mRNA, complete cds [NM_117497]                                                            | 4.30                    | NM_117497    |
| 14   | Arabidopsis thaliana uncharacterized protein mRNA, complete cds [NM_122326]                                                            | 4.28                    | NM_122326    |
| 15   | Arabidopsis thaliana cysteine-rich receptor-like protein kinase 7 mRNA, complete cds [NM_118444]                                       | 4.23                    | NM_118444    |
| 16   | Arabidopsis thaliana protein PHYTOALEXIN DEFICIENT 3 mRNA, complete cds [NM_11355]                                                     | 4.23                    | NM_113595    |
| 17   | Arabidopsis thaliana carboxylate clamp-tetratricopeptide repeat protein mRNA, complete cds [NM_100136543]                              | 4.12                    | NM_001036543 |
| 18   | Arabidopsis thaliana putative cysteine-rich receptor-like protein kinase 30 mRNA, complete cds [NM_117217]                             | 4.04                    | NM_117217    |
| 19   | Arabidopsis thaliana bifunctional inhibitor/lipid-transfer protein/seed storage 2S albumin-like protein mRNA, complete cds [NM_104930] | 4.01                    | NM_104930    |
| 20   | Arabidopsis thaliana carboxylate clamp-tetratricopeptide repeat protein mRNA, complete cds [NM_117310]                                 | 4.01                    | NM_117310    |
| 21   | Arabidopsis thaliana TRAF-like family protein mRNA, complete cds [NM_116369]                                                           | 3.94                    | NM_116369    |
| 22   | Arabidopsis thaliana beta 1,3-glucanase 2 mRNA, complete cds [NM_115586]                                                               | 3.92                    | NM_115586    |
| 23   | Arabidopsis thaliana cell differentiation, Rcd1-like protein mRNA, complete cds [NM_128814]                                            | 3.90                    | NM_128814    |
| 24   | Arabidopsis thaliana OSBP(oxysterol binding protein)-related protein 4B-like protein mRNA, complete cds [NM_001036642]                 | 3.82                    | NM_001036642 |
| 25   | Arabidopsis thaliana putative germin-like protein subfamily 2 member 5 mRNA, complete cds [NM_180544]                                  | 3.81                    | NM_180544    |
| 26   | Arabidopsis thaliana Thioredoxin superfamily protein mRNA, complete cds [NM_123252]                                                    | 3.79                    | NM_123252    |
| 27   | Arabidopsis thaliana class I heat shock protein mRNA, complete cds [NM_100614]                                                         | 3.68                    | NM_100614    |
| 28   | AV799583 RAFL9 Arabidopsis thaliana cDNA clone RAFL09-20-J17 3', mRNA sequence [A1]                                                    | 3.65                    | AV799583     |
| 29   | Arabidopsis thaliana protein TUNICAMYCIN INDUCED 1 mRNA, complete cds [NM_125847]                                                      | 3.64                    | NM_125847    |
| 30   | Arabidopsis thaliana uncharacterized protein mRNA, complete cds [NM_202810]                                                            | 3.61                    | NM_202810    |
| 31   | Arabidopsis thaliana early light-inducible protein 2 mRNA, complete cds [NM_117551]                                                    | 3.60                    | NM_117551    |
| 32   | Arabidopsis thaliana heat shock protein 90.1 mRNA, complete cds [NM_124642]                                                            | 3.55                    | NM_124642    |
| 33   | Arabidopsis thaliana peroxidase 59 mRNA, complete cds [NM_121996]                                                                      | 3.47                    | NM_121996    |
| 34   | Arabidopsis thaliana glutathione S-transferase F7 mRNA, complete cds [NM_100173]                                                       | 3.47                    | NM_100173    |
| 35   | Arabidopsis thaliana HSP20-like chaperone mRNA, complete cds [NM_104679]                                                               | 3.45                    | NM_104679    |
| 36   | Arabidopsis thaliana 3'(2'),5'-bisphosphate nucleotidase mRNA, complete cds [NM_125796]                                                | 3.44                    | NM_125796    |
| 37   | Rep: meprin and TRAF homology domain-containing protein / MATH domain-containing protein mRNA, complete cds [DR378967]                 | 3.41                    | DR378967     |
| 38   | Arabidopsis thaliana probable carboxylesterase 6 mRNA, complete cds [NM_105534]                                                        | 3.39                    | NM_105534    |
| 39   | Arabidopsis thaliana receptor like protein 41 mRNA, complete cds [NM_113405]                                                           | 3.39                    | NM_113405    |
| 40   | Arabidopsis thaliana heat stress transcription factor A-2 mRNA, complete cds [NM_0011249]                                              | 3.39                    | NM_001124916 |
| 41   | Arabidopsis thaliana nodulin MN21-like transporter family protein mRNA, complete cds [NM_118943]                                       | 3.38                    | NM_118943    |
| 42   | Arabidopsis thaliana uncharacterized protein mRNA, complete cds [NM_112249]                                                            | 3.38                    | NM_112249    |
| 43   | Arabidopsis thaliana protease inhibitor/seed storage/lipid transfer protein (LTP) family protein mRNA, complete cds [NM_113159]        | 3.38                    | NM_113159    |
| 44   | Arabidopsis thaliana FAD-binding and BBE domain-containing protein mRNA, complete cds [NM_102406]                                      | 3.37                    | NM_102406    |
| 45   | Arabidopsis thaliana cysteine-rich receptor-like protein kinase 36 mRNA, complete cds [NM_116687]                                      | 3.36                    | NM_116687    |
| 46   | Arabidopsis thaliana receptor like protein 40 mRNA, complete cds [NM_113404]                                                           | 3.30                    | NM_113404    |
| 47   | Arabidopsis thaliana RPD3-like histone deacetylase mRNA, complete cds [NM_125705]                                                      | 3.30                    | NM_125705    |
| 48   | Arabidopsis thaliana chlorophyll A-B binding, early light-inducible protein mRNA, complete cds [NM_113183]                             | 3.30                    | NM_113183    |
| 49   | Arabidopsis thaliana aldo-keto reductase family 4 member C9 mRNA, complete cds [NM_001036428]                                          | 3.29                    | NM_001036428 |
| 50   | Arabidopsis thaliana glucose-6-phosphate/phosphate translocator 2 mRNA, complete cds [NM_104862]                                       | 3.29                    | NM_104862    |
| 51   | Arabidopsis thaliana uncharacterized protein mRNA, complete cds [NM_202810]                                                            | 3.27                    | NM_202810    |
| 52   | Arabidopsis thaliana peptidyl-L-prolyl cis-trans isomerase FKBP65 mRNA, complete cds [NM_124233]                                       | 3.26                    | NM_124233    |
| 53   | Arabidopsis thaliana Predicted AT-hook DNA-binding family protein mRNA, complete cds [NM_124348]                                       | 3.25                    | NM_124348    |
| 54   | Arabidopsis thaliana amino acid transporter 1 mRNA, complete cds [NM_118231]                                                           | 3.23                    | NM_118231    |
| 55   | Arabidopsis thaliana leucine-rich repeat extensin-like protein 1 mRNA, complete cds [NM_101076]                                        | 3.21                    | NM_101076    |
| 56   | Arabidopsis thaliana Uridine diphosphate glycosyltransferase 74E2 mRNA, complete cds [NM_100448]                                       | 3.19                    | NM_100448    |
| 57   | Arabidopsis thaliana Ran BP2/NZF zinc finger-like protein mRNA, complete cds [NM_201806]                                               | 3.19                    | NM_201806    |
| 58   | Arabidopsis thaliana uncharacterized protein mRNA, complete cds [NM_180427]                                                            | 3.14                    | NM_180427    |
| 59   | Arabidopsis thaliana Dof-type zinc finger DNA-binding family protein mRNA, complete cds [NM_102442]                                    | 3.14                    | NM_102442    |
| 60   | Arabidopsis thaliana protease inhibitor/seed storage/lipid transfer protein (LTP) family protein mRNA, complete cds [NM_113159]        | 3.10                    | NM_113159    |
| 61   | Arabidopsis thaliana heat shock protein 90.1 mRNA, complete cds [NM_124642]                                                            | 3.06                    | NM_124642    |
| 62   | Arabidopsis thaliana probable xyloglucan endotransglucosylase/hydrolase protein 33 mRNA, complete cds [NM_100930]                      | 3.05                    | NM_100930    |
| 63   | Arabidopsis thaliana TPX2 (targeting protein for Xk1p2) family protein mRNA, complete cds [NM_110965]                                  | 3.05                    | NM_110965    |
| 64   | Rep: Cysteine protease-related - Arabidopsis thaliana (Mouse-ear cross), partial (96%) [TC35]                                          | 3.02                    | TC398032     |
| 65   | Arabidopsis thaliana 3-ketoacyl-CoA synthase 14 mRNA, complete cds [NM_111863]                                                         | 3.02                    | NM_111863    |
| 66   | Arabidopsis thaliana cadmium resistance protein 1 mRNA, complete cds [NM_101357]                                                       | 3.00                    | NM_101357    |
| 67   | Arabidopsis thaliana vacuolar cation/proton exchanger 3 mRNA, complete cds [NM_115045]                                                 | 3.00                    | NM_115045    |
| 68   | AYBIS24TF pooled cDNA populations Arabidopsis thaliana cDNA, mRNA sequence [EG519]                                                     | 2.99                    | EG519080     |
| 69   | Arabidopsis thaliana putative WRKY transcription factor 51 mRNA, complete cds [NM_125877]                                              | 2.97                    | NM_125877    |
| 70   | Arabidopsis thaliana aspartyl protease family protein mRNA, complete cds [NM_103539]                                                   | 2.95                    | NM_103539    |
| 71   | Arabidopsis thaliana putative calcium-binding protein CML47 mRNA, complete cds [NM_1144]                                               | 2.94                    | NM_114616    |
| 72   | Arabidopsis thaliana glutathione peroxidase 7 mRNA, complete cds [NM_119337]                                                           | 2.94                    | NM_119337    |
| 73   | Arabidopsis thaliana wall-associated receptor kinase 3 mRNA, complete cds [NM_101977]                                                  | 2.94                    | NM_101977    |
| 74   | Arabidopsis thaliana receptor like protein 23 mRNA, complete cds [NM_128827]                                                           | 2.93                    | NM_128827    |
| 75   | Arabidopsis thaliana nuclear transcription factor Y subunit A-10 mRNA, complete cds [NM_203013]                                        | 2.92                    | NM_203013    |
| 76   | Arabidopsis thaliana nuclear transcription factor Y subunit A-5 mRNA, complete cds [NM_104294]                                         | 2.92                    | NM_104294    |
| 77   | Arabidopsis thaliana putative E3 ubiquitin-protein ligase RF4 mRNA, complete cds [NM_001197970]                                        | 2.91                    | NM_001197970 |
| 78   | Arabidopsis thaliana Inositol monophosphatase family protein mRNA, complete cds [NM_120965]                                            | 2.91                    | NM_120965    |
| 79   | Arabidopsis thaliana RING-H2 finger protein AT17 mRNA, complete cds [NM_117083]                                                        | 2.90                    | NM_117083    |
| 80   | Arabidopsis thaliana multiprotein-bridging factor 1c mRNA, complete cds [NM_113358]                                                    | 2.90                    | NM_113358    |
| 81   | Arabidopsis thaliana mRNA, clone: RAFL17-50-E02 [AK117807]                                                                             | 2.90                    | AK117807     |
| 82   | Arabidopsis thaliana ribonuclease 1 mRNA, complete cds [NM_126351]                                                                     | 2.88                    | NM_126351    |
| 83   | Arabidopsis thaliana putative WRKY transcription factor 50 mRNA, complete cds [NM_12251]                                               | 2.88                    | NM_122518    |
| 84   | Arabidopsis thaliana NAC domain-containing protein 42 mRNA, complete cds [NM_129861]                                                   | 2.88                    | NM_129861    |
| 85   | Arabidopsis thaliana uncharacterized protein mRNA, complete cds [NM_001035694]                                                         | 2.88                    | NM_001035694 |
| 86   | Arabidopsis thaliana glucose-6-phosphate/phosphate translocator 2 mRNA, complete cds [NM_104862]                                       | 2.86                    | NM_104862    |
| 87   | Arabidopsis thaliana cysteine protease-like protein mRNA, complete cds [NM_128302]                                                     | 2.86                    | NM_128302    |
| 88   | BP619544 RAFL16 Arabidopsis thaliana cDNA clone RAFL16-33-K16 3', mRNA sequence [I]                                                    | 2.84                    | BP619544     |
| 89   | Arabidopsis thaliana Glycosyltransferase family 61 protein mRNA, complete cds [NM_11186]                                               | 2.84                    | NM_111867    |
| 90   | Arabidopsis thaliana putative WRKY transcription factor 50 mRNA, complete cds [NM_12251]                                               | 2.83                    | NM_122518    |
| 91   | Arabidopsis thaliana Nuclear transport factor 2 (NTF2) family protein mRNA, complete cds [NM_120252]                                   | 2.82                    | NM_120252    |
| 92   | Arabidopsis thaliana uncharacterized protein mRNA, complete cds [NM_113746]                                                            | 2.82                    | NM_113746    |
| 93   | Arabidopsis thaliana uncharacterized protein mRNA, complete cds [NM_113746]                                                            | 2.79                    | NM_113746    |
| 94   | Arabidopsis thaliana uncharacterized protein mRNA, complete cds [NM_118479]                                                            | 2.78                    | NM_118479    |
| 95   | Arabidopsis thaliana clone 31878 mRNA, complete sequence [AY087114]                                                                    | 2.78                    | AY087114     |
| 96   | Arabidopsis thaliana uncharacterized protein mRNA, complete cds [NM_180589]                                                            | 2.78                    | NM_180589    |
| 97   | Arabidopsis thaliana UDP-glycosyltransferase 73C5 mRNA, complete cds [NM_129235]                                                       | 2.76                    | NM_129235    |
| 98   | Arabidopsis thaliana heavy-metal-associated domain-containing protein mRNA, complete cds [NM_180545]                                   | 2.76                    | NM_180545    |
| 99   | Arabidopsis thaliana pollen_Ole_e_1 domain-containing protein mRNA, complete cds [NM_120632]                                           | 2.76                    | NM_120632    |
| 100  | Arabidopsis thaliana uncharacterized protein mRNA, complete cds [NM_179014]                                                            | 2.76                    | NM_179014    |
